# Supplementary material for: High CO2/hypoxia-induced softening of persimmon fruit is modulated by DkERF8/16 and DkNAC9 complexes
Source: PubMed Central journal article supplement (PMC7210769; doi:10.1093/jxb/eraa009), 2020-01-12
Supplement: eraa009_suppl_supplementary_figures_s1_s7_tables_s1_s2.pdf [file eraa009_suppl_supplementary_figures_s1_s7_tables_s1_s2.pdf]

**Fig. S1**

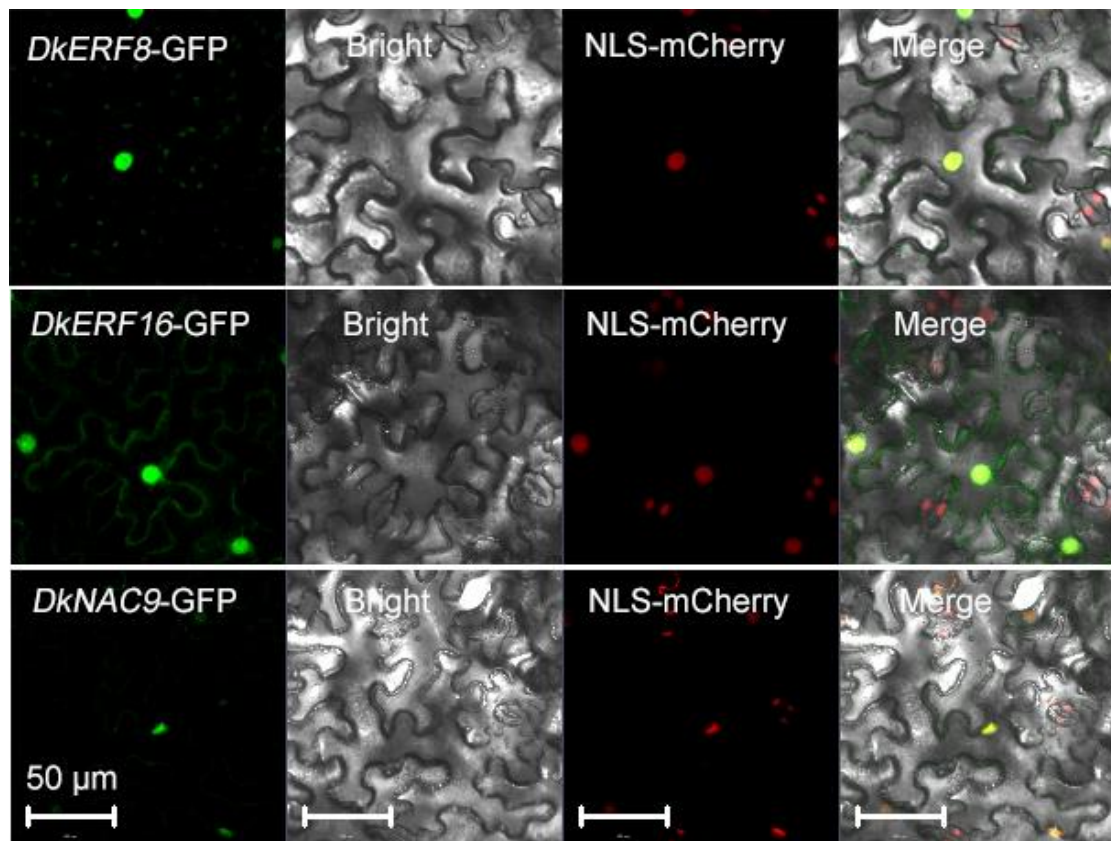

**Supplementary Figure S1.** Subcellular localization of *DkERF8/16*-GFP and *DkNAC9*-GFP in tobacco leaves.

Fig. S2

**A**

P1: -1902bp GCAATCTAAATTGCAAAAAGTGTGTTGCACTTTC -1870bp  
P2: -1188bp GGTCTCCGAACAAAGGTTTTGTTGTCTGG -1160bp  
P3: -773bp CATATATTGTGGTATTTGTTGTGTTATTG -746bp  
P4: -451bp GAATTAATCTATCACAAACACAGCCTAGATTGC -419bp

**B**

| Probe                  | P1 |   |   | P2 |   |   | P3 |   |   | P4 |   |   |
|------------------------|----|---|---|----|---|---|----|---|---|----|---|---|
| Protein <i>DkERF8</i>  | -  | + | - | -  | + | - | -  | + | - | -  | + | - |
| Protein <i>DkERF16</i> | -  | - | + | -  | - | + | -  | - | + | -  | - | + |

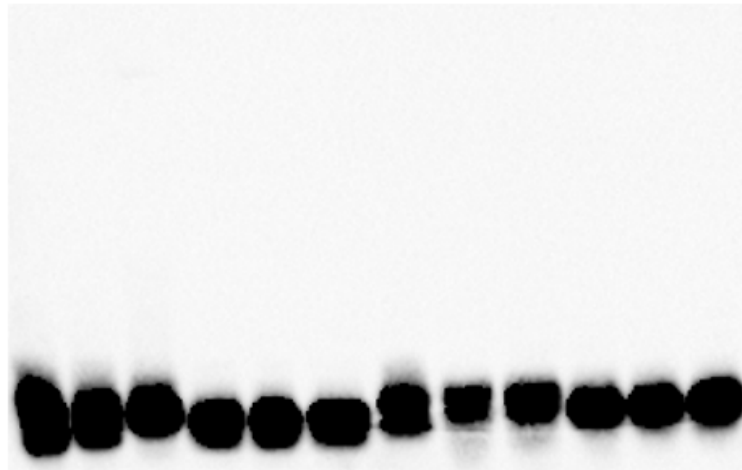

Supplementary Figure S2. Analysis of the binding ability of DkERF8/16 to the promoter of *DkEGase1*.

Fig. S3

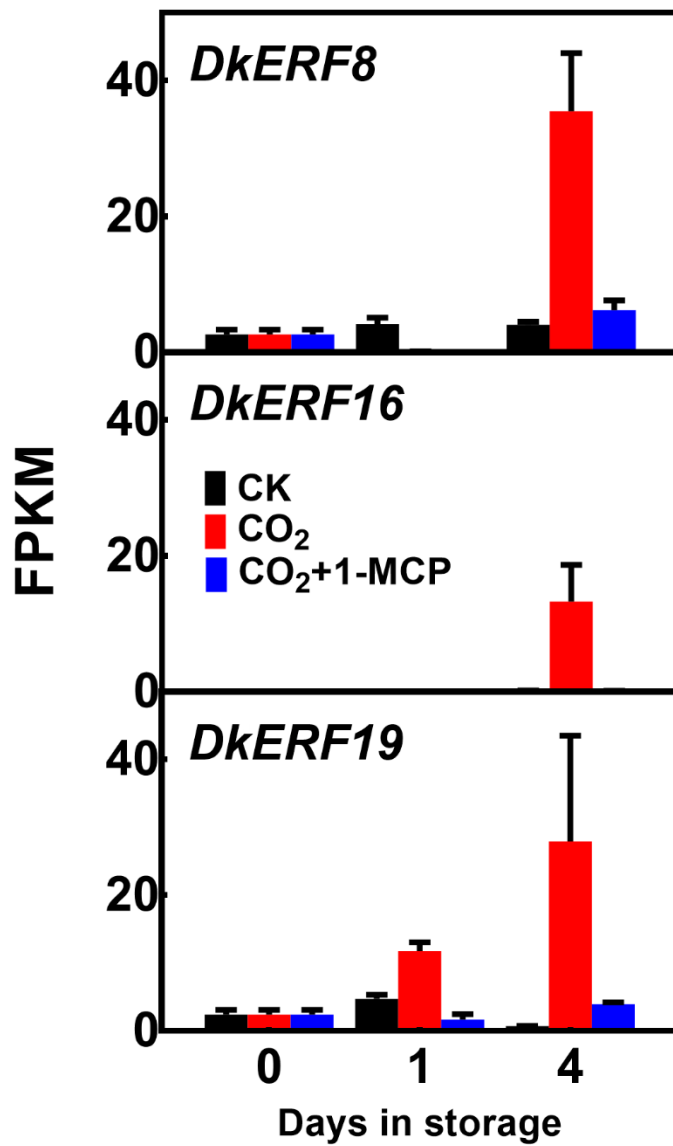

Supplementary Figure S3. The FPKM of previous reported *DkERFs* in response to CO<sub>2</sub> and CO<sub>2</sub> + 1-MCP treatments in 'Jingmianshi' cultivar.

**Fig. S4**

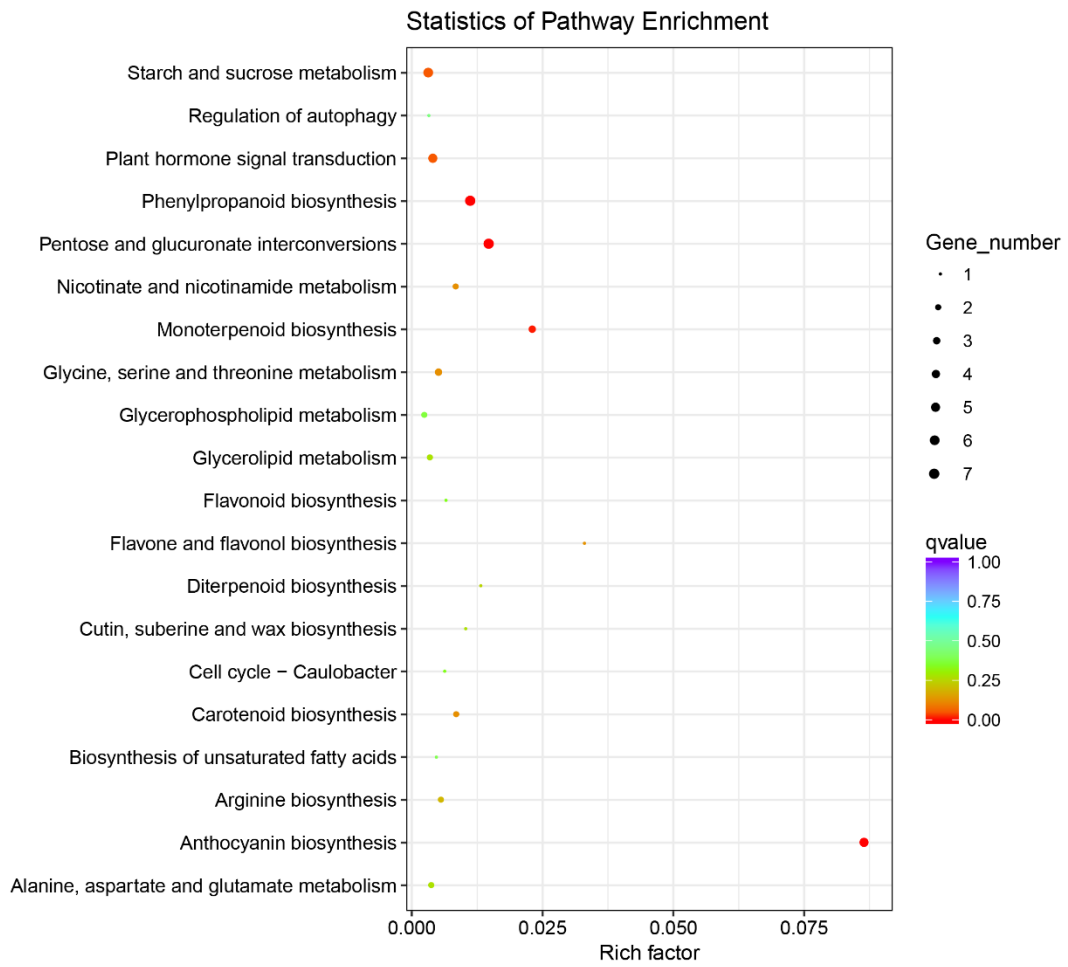

**Supplementary Figure S4.** KEGG enrichment analyses of DEGs in response to different treatments.

Fig. S5

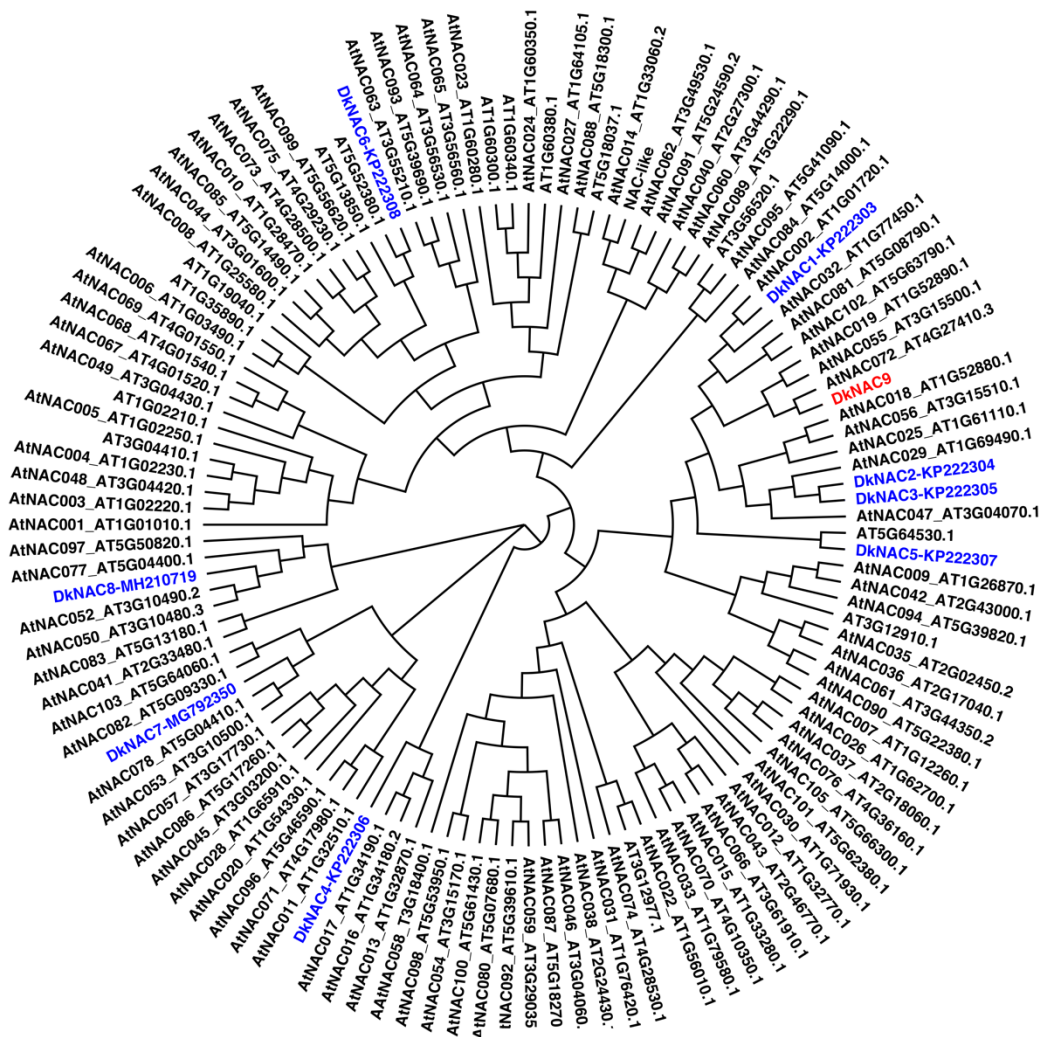

Supplementary Figure S5. Phylogenetic analyses of persimmon NAC genes.

**Fig. S6**

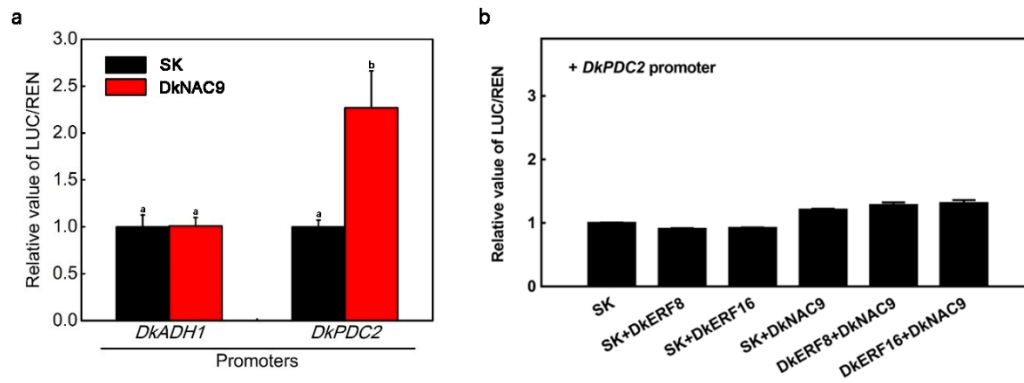

**Supplementary Figure S6.** Regulatory effects of DkNAC9 with or without DkERF8/16 on the promoters of *DkADH1* and *DkPDC2*.

Fig. S7

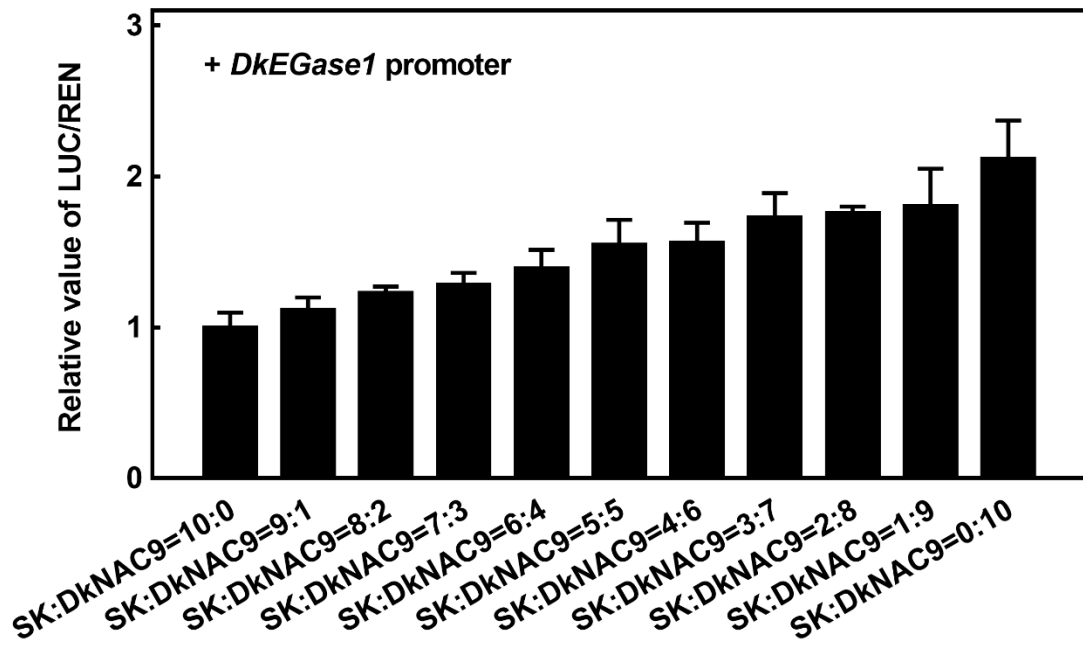

Supplementary Figure S7. Effects of different dilutions of DkNAC9 on *DkEGase1* promoter.

**Supplementary Table S1.** Sequences of the primers used for real time PCR.

| <b>Gene</b>          | <b>Methods used</b> | <b>Primers (5'-3')</b> |
|----------------------|---------------------|------------------------|
| <i>DkERF35</i>       | Q-PCR (FP)          | GTGGGTACCAACACAATGAATC |
| <i>DkERF35</i>       | Q-PCR (RP)          | AGCATCCAGAGATCAACCAAGT |
| <i>DkYABBY2</i>      | Q-PCR (FP)          | CAAAGCTGGAAATCCCGATA   |
| <i>DkYABBY2</i>      | Q-PCR (RP)          | GATCAGGCAAAAGTCCGAAA   |
| <i>DkbZIP12</i>      | Q-PCR (FP)          | CATGGCAGTCGAAACAGAGA   |
| <i>DkbZIP12</i>      | Q-PCR (RP)          | GGCAGAGACTGGTGAGGAAG   |
| <i>DkNAC9</i>        | Q-PCR (FP)          | GGGCTGTAGAGGAGGAGGTT   |
| <i>DkNAC9</i>        | Q-PCR (RP)          | TTTTCCTTCACTGCCGAAAC   |
| <i>DkAlfin-like1</i> | Q-PCR (FP)          | GACTGCCAAGAAACAAGCAA   |
| <i>DkAlfin-like1</i> | Q-PCR (RP)          | ACAAGCCCCACACAAGGTAT   |
| <i>DkWRKY3</i>       | Q-PCR (FP)          | CGGATGTTCAAGAGTTTTTGG  |
| <i>DkWRKY3</i>       | Q-PCR (RP)          | GATGGCGATCATCTTGGATAA  |
| <i>DkbZIP13</i>      | Q-PCR (FP)          | GCTGTAGCGATGGAGGAGTC   |
| <i>DkbZIP13</i>      | Q-PCR (RP)          | GACGGGTTGGTTCAGGTAGA   |
| <i>DkPLATZ1</i>      | Q-PCR (FP)          | GGGTTGTAAGCTTGCAGGAA   |
| <i>DkPLATZ1</i>      | Q-PCR (RP)          | ATGTCTTGTTGCGACCCTTC   |
| <i>DkNAC21</i>       | Q-PCR (FP)          | GGAAGAATGCCATCCCAGTA   |
| <i>DkNAC21</i>       | Q-PCR (RP)          | AATTCTTCCACCCTGCATTG   |
| <i>DkERF34</i>       | Q-PCR (FP)          | CGGTTCGTGAAGGAGAAGAG   |
| <i>DkERF34</i>       | Q-PCR (RP)          | CTGACGGCACCTTGAATATG   |
| <i>DkZAT1</i>        | Q-PCR (FP)          | TGTAACCGGGAGTTTTTCGTC  |
| <i>DkZAT1</i>        | Q-PCR (RP)          | TTCTCGTAGGGCGTCAAGTT   |



**Supplementary Table S2.** Sequences of the primers used for vector construction.

| <b>Gene</b>          | <b>Methods used</b>             | <b>Primers (5'-3')</b>                           |
|----------------------|---------------------------------|--------------------------------------------------|
| <i>DkERF35</i>       | SK vector<br>construction (FP)  | GCTCTAGAACTAGTGGATCCATGTGCGG<br>TGGGGCGATCAT     |
| <i>DkERF35</i>       | SK vector<br>construction (RP)  | ATAAGCTTGATATCGAATTCTTAGAACC<br>CCAGGTGGTGATG    |
| <i>DkYABBY2</i>      | SK vector<br>construction (FP)  | GCTCTAGAACTAGTGGATCCATGTCCTC<br>CTCATCATCCG      |
| <i>DkYABBY2</i>      | SK vector<br>construction (RP)  | ATAAGCTTGATATCGAATTCTTAGTAGG<br>GGGATAGCC        |
| <i>DkNAC9</i>        | SK vector<br>construction (FP)  | ATAGCGGCCGCATGGGATTGCCGGTGTC<br>AGACCC           |
| <i>DkNAC9</i>        | SK vector<br>construction (RP)  | CTGACTAGTTTATTCTCTGTTTTCTTC<br>ACTGC             |
| <i>DkAlfin-like1</i> | SK vector<br>construction (FP)  | GCTCTAGAACTAGTGGATCCATGGATGG<br>CGGAGGACCGTAC    |
| <i>DkAlfin-like1</i> | SK vector<br>construction (RP)  | ATAAGCTTGATATCGAATTCTCAAGGCC<br>GCGCTCTCTTG      |
| <i>DkbZIP13</i>      | SK vector<br>construction (FP)  | GCTCTAGAACTAGTGGATCCATGGCCTC<br>TTCAAGCC         |
| <i>DkbZIP13</i>      | SK vector<br>construction (RP)  | ATAAGCTTGATATCGAATTCTCAGGACA<br>TGATCATG         |
| <i>DkPLATZ1</i>      | SK vector<br>construction (FP)  | GCTCTAGAACTAGTGGATCCATGCGGGT<br>TCCGCCATG        |
| <i>DkPLATZ1</i>      | SK vector<br>construction (RP)  | ATAAGCTTGATATCGAATTCCTAGGCCG<br>CAAGCGG          |
| <i>DkERF34</i>       | SK vector<br>construction (FP)  | GCTCTAGAACTAGTGGATCCATGGAAG<br>GCAGTTGCACAG      |
| <i>DkERF34</i>       | SK vector<br>construction (RP)  | ATAAGCTTGATATCGAATTCTTACAAAG<br>CCACTCCAATG      |
| <i>DkZAT1</i>        | SK vector<br>construction (FP)  | GCTCTAGAACTAGTGGATCCATGACGGT<br>GTTGACGAAG       |
| <i>DkZAT1</i>        | SK vector<br>construction (RP)  | ATAAGCTTGATATCGAATTCTCATCGGG<br>CAATTTGCAAC      |
| <i>DkNAC9</i>        | GFP vector<br>construction (FP) | ACGGGGGACGAGCTCGGTACCATGGGA<br>TTGCCGGTGTCAGACC  |
| <i>DkNAC9</i>        | GFP vector<br>construction (RP) | GCCCTTGCTCACCATGTCGACCTGCCGA<br>AACCCGAATTGTC    |
| <i>DkERF8</i>        | GFP vector<br>construction (FP) | ACGGGGGACGAGCTCGGTACCATGCAA<br>GCAAGCAACGATATTCG |
| <i>DkERF8</i>        | GFP vector<br>construction (RP) | GCCCTTGCTCACCATGTCGACATTAGCA<br>AGAACTTCCCAA     |

| <b>Gene</b>    | <b>Methods used</b>           | <b>Primers (5'-3')</b>                              |
|----------------|-------------------------------|-----------------------------------------------------|
| <i>DkERF16</i> | GFP vector construction (FP)  | ACGGGGGACGAGCTCGGTACCATGGCT<br>AGACCTCAGCAGCGA      |
| <i>DkERF16</i> | GFP vector construction (RP)  | GCCCTTGCTCACCATGTGCGACCATAGCC<br>TGATGAGATGGAAC     |
| <i>DkNAC9</i>  | GST vector construction (FP)  | GGATCTGGTTCCGCGTGGATCCATGGGA<br>TTGCCGGTGTTCAG      |
| <i>DkNAC9</i>  | GST vector construction (RP)  | CGATGCGGCCGCTCGAGTCGACTCACTG<br>CCGAAACCCGAATTG     |
| <i>DkERF8</i>  | GST vector construction (FP)  | GGATCTGGTTCCGCGTGGATCCATGCAA<br>GCAAGCAACGATATTC    |
| <i>DkERF8</i>  | GST vector construction (RP)  | CGATGCGGCCGCTCGAGTCGACCTAATT<br>AGCAAGAACTTCCCAAATC |
| <i>DkERF16</i> | GST vector construction (FP)  | GGATCTGGTTCCGCGTGGATCCATGGCT<br>AGACCTCAGCAGCG      |
| <i>DkERF16</i> | GST vector construction (RP)  | CGATGCGGCCGCTCGAGTCGACTCACAT<br>AGCCTGATGAGATGG     |
| <i>DkNAC9</i>  | YFP vector construction (FP)  | TACGAACGATAGTTAATTAATATGGGAT<br>TGCCGGTGTTCAGA      |
| <i>DkNAC9</i>  | YFP vector construction (RP)  | TCCTCCACTAGTGGCGCGCCCCTGCCGA<br>AACCCGAATT          |
| <i>DkERF8</i>  | YFP vector construction (FP)  | TACGAACGATAGTTAATTAATATGCAAG<br>CAAGCAACGATAT       |
| <i>DkERF8</i>  | YFP vector construction (RP)  | TCCTCCACTAGTGGCGCGCCCATTAGCA<br>AGAACTTCCCAAATC     |
| <i>DkERF16</i> | YFP vector construction (FP)  | TACGAACGATAGTTAATTAATATGGCTA<br>GACCTCAGCAGCG       |
| <i>DkERF16</i> | YFP vector construction (RP)  | TCCTCCACTAGTGGCGCGCCCCATAGCC<br>TGATGAGATGGAACA     |
| <i>DkNAC9</i>  | nLuc vector construction (FP) | ACGGGGGACGAGCTCGGTACCATGGGA<br>TTGCCGGTGTTCAG       |
| <i>DkNAC9</i>  | nLuc vector construction (RP) | CGCGTACGAGATCTGGTTCGACCTGCCGA<br>AACCCGAATTG        |
| <i>DkERF8</i>  | nLuc vector construction (FP) | ACGGGGGACGAGCTCGGTACCATGCAA<br>GCAAGCAACGATATTC     |
| <i>DkERF8</i>  | nLuc vector construction (RP) | CGCGTACGAGATCTGGTTCGACATTAGCA<br>AGAACTTCCCAAATC    |
| <i>DkERF16</i> | nLuc vector construction (FP) | ACGGGGGACGAGCTCGGTACCATGGCT<br>AGACCTCAGCAGCG       |
| <i>DkERF16</i> | nLuc vector construction (RP) | CGCGTACGAGATCTGGTTCGACCATAGCC<br>TGATGAGATGG        |
| <i>DkNAC9</i>  | cLuc vector construction (FP) | TACGCGTCCCAGGGGCGGTACCATGGGAT<br>TGCCGGTGTTCAG      |

| <b>Gene</b>    | <b>Methods used</b>              | <b>Primers (5'-3')</b>                             |
|----------------|----------------------------------|----------------------------------------------------|
| <i>DkNAC9</i>  | cLuc vector<br>construction (RP) | ACGAAAGCTCTGCAGGTCGACTCACTGC<br>CGAAACCCGAATTG     |
| <i>DkERF8</i>  | cLuc vector<br>construction (FP) | TACGCGTCCCGGGGCGGTACCATGCAA<br>GCAAGCAACGATATTC    |
| <i>DkERF8</i>  | cLuc vector<br>construction (RP) | ACGAAAGCTCTGCAGGTCGACCTAATTA<br>GCAAGAACTTCCCAAATC |
| <i>DkERF16</i> | cLuc vector<br>construction (FP) | TACGCGTCCCGGGGCGGTACCATGGCTA<br>GACCTCAGCAGCG      |
| <i>DkERF16</i> | cLuc vector<br>construction (RP) | ACGAAAGCTCTGCAGGTCGACTCACATA<br>GCCTGATGAGATGG     |
